# Supplementary material for: Step-wise activation of a Family C GPCR
Source: PubMed Central journal article supplement — bioRxiv. 2023 Aug 30:2023.08.29.555158. Preprint. [Version 1] doi: 10.1101/2023.08.29.555158 (PMC10491200; doi:10.1101/2023.08.29.555158), 2023-08-30
Supplement: media-1.pdf [file media-1.pdf]

## Cryo-EM data collection, refinement and validation statistics

|                                                  | CDPPB bound<br>inactive mGlu5<br>(EMDB-41069)<br>(PDB 8T6J) | Quis bound<br>intermediate mGlu5-<br>Nb43<br>(EMDB-41092)<br>(PDB 8T7H) | Quis bound<br>active mGlu5-Nb43<br>(EMDB-41099)<br>(PDB 8T8M) | Quis+CDPPB bound<br>active mGlu5-Nb43<br>(EMDB-41139)<br>(PDB 8TAO) |
|--------------------------------------------------|-------------------------------------------------------------|-------------------------------------------------------------------------|---------------------------------------------------------------|---------------------------------------------------------------------|
| <b>Data collection and processing</b>            |                                                             |                                                                         |                                                               |                                                                     |
| Magnification                                    | 107000                                                      | 82000                                                                   | 82000                                                         | 82000                                                               |
| Voltage (kV)                                     | 300                                                         | 300                                                                     | 300                                                           | 300                                                                 |
| Electron exposure (e-/Å <sup>2</sup> )           | 52.2                                                        | 50                                                                      | 50                                                            | 51.6                                                                |
| Defocus range (µm)                               | 0.7-2                                                       | 0.7-2                                                                   | 0.7-2                                                         | 0.7-2                                                               |
| Pixel size (Å)                                   | 0.8521                                                      | 1.111                                                                   | 1.111                                                         | 1.111                                                               |
| Symmetry imposed                                 | C2                                                          | C2                                                                      | C2                                                            | C1                                                                  |
| Initial particle images (no.)                    | 3,565,734                                                   | 4,317,126                                                               | 4,317,126                                                     | 5,033,648                                                           |
| Final particle images (no.)                      | 246,232                                                     | 211,019                                                                 | 183,295                                                       | 245,439                                                             |
| Map resolution (Å)                               | 3.5                                                         | 3.3                                                                     | 3.0                                                           | 2.9                                                                 |
| FSC threshold                                    | 0.143                                                       | 0.143                                                                   | 0.143                                                         | 0.143                                                               |
| Map resolution range (Å)                         | 2.8-5.6                                                     | 3.0-7.0                                                                 | 3.0-7.0                                                       | 2.5-7.2                                                             |
| <b>Refinement</b>                                |                                                             |                                                                         |                                                               |                                                                     |
| Initial model used (PDB code)                    | 6N52                                                        | 6N51 and 6N52                                                           | 6N51                                                          | 6N51                                                                |
| Model resolution (Å)                             | 3.4                                                         | 3.5                                                                     | 3.2                                                           | 3.1                                                                 |
| FSC threshold                                    | 0.5                                                         | 0.5                                                                     | 0.5                                                           | 0.5                                                                 |
| Model resolution range (Å)                       | 31.6-3.4                                                    | 38.5-3.5                                                                | 42.6-3.2                                                      | 2.9-3.1                                                             |
| Map sharpening <i>B</i> factor (Å <sup>2</sup> ) | -22.85                                                      | -59.41                                                                  | -25.33                                                        | -51.06                                                              |
| Model composition                                |                                                             |                                                                         |                                                               |                                                                     |
| Non-hydrogen atoms                               | 11652                                                       | 13100                                                                   | 13146                                                         | 13422                                                               |
| Protein residues                                 | 1534                                                        | 1794                                                                    | 1770                                                          | 1794                                                                |
| Ligands                                          | 2                                                           | 2                                                                       | 2                                                             | 3                                                                   |
| <i>B</i> factors (Å <sup>2</sup> )               |                                                             |                                                                         |                                                               |                                                                     |
| Protein                                          | 60.67                                                       | 30.43                                                                   | 36.58                                                         | 45.08                                                               |
| Ligand                                           | 55.65                                                       | 17.07                                                                   | 11.77                                                         | 46.72                                                               |
| R.m.s. deviations                                |                                                             |                                                                         |                                                               |                                                                     |
| Bond lengths (Å)                                 | 0.002                                                       | 0.003                                                                   | 0.003                                                         | 0.002                                                               |
| Bond angles (°)                                  | 0.579                                                       | 0.597                                                                   | 0.534                                                         | 0.509                                                               |
| Validation                                       |                                                             |                                                                         |                                                               |                                                                     |
| MolProbity score                                 | 1.69                                                        | 1.73                                                                    | 1.64                                                          | 1.48                                                                |
| Clashscore                                       | 6.09                                                        | 7.94                                                                    | 6.10                                                          | 4.70                                                                |
| Poor rotamers (%)                                | 0.00                                                        | 0.00                                                                    | 0.00                                                          | 0.00                                                                |
| Ramachandran plot                                |                                                             |                                                                         |                                                               |                                                                     |
| Favored (%)                                      | 94.88                                                       | 95.73                                                                   | 95.66                                                         | 96.40                                                               |
| Allowed (%)                                      | 5.12                                                        | 4.27                                                                    | 4.34                                                          | 3.60                                                                |
| Disallowed (%)                                   | 0.00                                                        | 0.00                                                                    | 0.00                                                          | 0.00                                                                |
